# Supplementary material for: Obesity alters the gustatory perception of lipids in the mouse: plausible involvement of lingual CD36
Source: PubMed Central journal article supplement (PMC3735945; doi:10.1194/jlr.m039446), 2013-09
Supplement: supp_M039446_jlr.M039446-1.pdf [file supp_M039446_jlr.M039446-1.pdf]

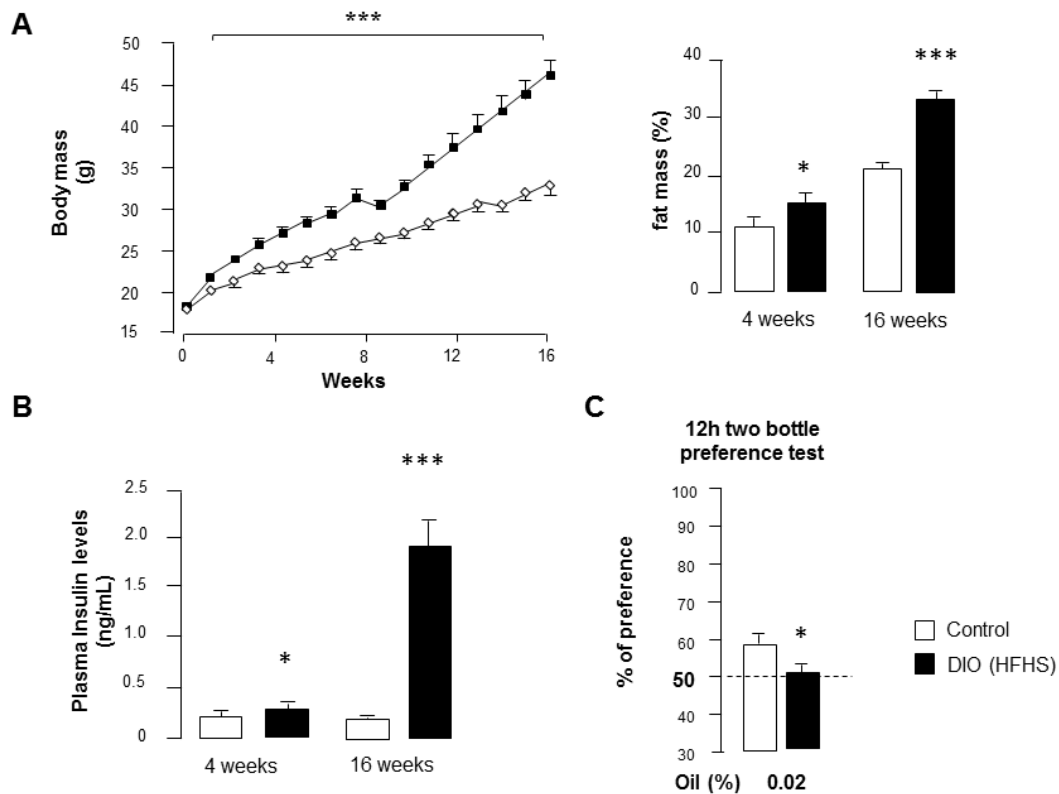

SD 1, Chevrot et al.

**SD Fig.1: Comparison of body composition, plasma insulin and preference for lipids in controls and mice chronically subjected to a High Fat High Sucrose- (HFHS) diet.**

**A-** Evolution of body and fat mass in controls and obese mice. Means  $\pm$  SEM, (n=20).  $P < 0.001$  (\*\*\*)).

**B-** Plasma insulin levels in overnight fasted controls and obese mice. Means  $\pm$ SEM (n=20).  $P < 0.05$  (\*) and  $P < 0.001$  (\*\*\*)).

**C-** Long-term (12 h) two-bottle preference tests performed in control and obese mice. Animals were simultaneously subjected for 12 h to a control solution (0.3% Xanthan gum in water, w/v) and to a test solution containing rapeseed oil (0.02%, w/v, in the control solution). Xanthan gum was used to minimize textural cues and to emulsify rapeseed oil. Dotted line represents the absence of preference. Means  $\pm$  SEM (n=12),  $P < 0.05$  (\*).
